# Supplementary material for: A Model for p38MAPK-Induced Astrocyte Senescence
Source: PubMed Central journal article supplement (PMC4425668; doi:10.1371/journal.pone.0125217), 2015-05-08
Supplement: pone.0125217.s001.pdf [file pone.0125217.s001.pdf]

## Dataset 1

Paper: Modelling p38MAPK-induced astrocyte senescence

Authors: Bruno Vendrusculo, Cristhian A Bugs, José C.M. Mombach

Model stable states for perturbations corresponding to *in silico* loss of function (LoF) and gain of function (GoF) experiments (see Table 3). Results were obtained using GINsim. For a LoF, the component value is constrained to value 0, whereas for a GoF the value is constrained to value 1 (for a Boolean case), or within a range of positive values (indicated between square brackets). States are displayed in the same way as in Figure 2. Stars (\*) denote any damage level. Below each table, a short interpretation indicates the main phenotypic changes compared to the wild type situation.

**p38MAPK LoF**

|  | apoptosis | cyclearrest | senescence | proliferation | SASP | CHEK1 | CHEK2 | Mdm2 | p14ARF | p53 | p21 | pRB | Wee1 | p16INK4a | p38MAPK | CdkCyclin | Cdc25ABC | E2F | ATM | ATR | DSB | SSB |   |
|--|-----------|-------------|------------|---------------|------|-------|-------|------|--------|-----|-----|-----|------|----------|---------|-----------|----------|-----|-----|-----|-----|-----|---|
|  |           |             |            | 1             |      |       |       |      | 1      |     |     |     |      |          |         | 1         | 2        | 1   |     |     |     |     |   |
|  | 1         |             |            |               |      |       |       | 1    |        | 1   | 1   | 1   |      |          |         |           | 2        |     |     | 1   |     |     | 1 |
|  | 1         |             |            |               |      |       |       | 1    |        | 1   | 1   | 1   |      |          |         |           | 2        |     | 1   |     | 1   |     |   |
|  | 1         |             |            |               |      |       |       | 1    |        | 1   | 1   | 1   |      |          |         |           | 2        |     | 1   | 1   | 1   | 1   |   |
|  | 1         |             |            |               |      | 1     |       | 1    |        | 1   | 1   | 1   | 1    |          |         |           | 1        |     |     | 2   |     | 2   | 2 |
|  | 1         |             |            |               |      | 1     |       | 1    |        | 1   | 1   | 1   | 1    |          |         |           | 1        |     | 1   | 2   | 1   | 2   | 2 |
|  | 1         |             |            |               |      | 1     | 1     | 1    |        | 1   | 1   | 1   | 1    |          |         |           | 1        |     | 2   |     | 2   |     |   |
|  | 1         |             |            |               |      | 1     | 1     | 1    |        | 1   | 1   | 1   | 1    |          |         |           | 1        |     | 2   | 1   | 2   | 1   | 1 |
|  | 1         |             |            |               |      | 1     | 1     | 1    |        | 1   | 1   | 1   | 1    |          |         |           | 1        |     | 2   | 2   | 2   | 2   | 2 |

No DNA damage: proliferation  
 With DNA damage: loss of senescence, apoptosis & SASP

**p38MAPK GoF [1-2]**

|  | apoptosis | cyclearrest | senescence | proliferation | SASP | CHEK1 | CHEK2 | Mdm2 | p14ARF | p53 | p21 | pRB | Wee1 | p16INK4a | p38MAPK | CdkCyclin | Cdc25ABC | E2F | ATM | ATR | DSB | SSB |   |
|--|-----------|-------------|------------|---------------|------|-------|-------|------|--------|-----|-----|-----|------|----------|---------|-----------|----------|-----|-----|-----|-----|-----|---|
|  | 1         |             |            |               |      |       |       |      |        |     |     | 1   |      | 1        | 1       |           | 1        |     |     |     |     |     |   |
|  | 1         |             |            |               |      |       |       | 1    |        | 1   | 1   | 1   |      | 1        | 1       |           | 1        |     |     | 1   |     |     | 1 |
|  | 1         |             |            |               |      |       |       | 1    |        | 1   | 1   | 1   |      | 1        | 1       |           | 1        |     | 1   | 1   | 1   | 1   |   |
|  | 1         |             |            |               |      | 1     |       | 1    |        | 1   | 1   | 1   | 1    | 1        | 1       |           | 1        |     |     | 2   |     | 2   | 2 |
|  | 1         |             |            |               |      | 1     |       | 1    |        | 1   | 1   | 1   | 1    | 1        | 1       |           | 1        |     | 1   | 2   | 1   | 2   | 2 |
|  | 1         | 1           |            |               | 1    | 1     | 1     | 1    |        | 1   | 1   | 1   | 1    | 1        | 2       |           |          |     | 2   |     | 2   |     |   |
|  | 1         | 1           |            |               | 1    | 1     | 1     | 1    |        | 1   | 1   | 1   | 1    | 1        | 2       |           |          |     | 2   | 1   | 2   | 1   | 1 |
|  | 1         | 1           |            |               | 1    | 1     | 1     | 1    |        | 1   | 1   | 1   | 1    | 2        |         |           |          |     | 2   | 2   | 2   | 2   | 2 |

No DNA damage: cycle arrest  
 With DNA damage: senescence enhanced & loss of apoptosis

**p38MAPK GoF [3]**

|   | apoptosis | cyclearrest | senescence | proliferation | SASP | CHEK1 | CHEK2 | Mdm2 | p14ARF | p53 | p21 | pRB | Wee1 | p16INK4a | p38MAPK | CdkCyclin | Cdc25ABC | E2F | ATM | ATR | DSB | SSB |
|---|-----------|-------------|------------|---------------|------|-------|-------|------|--------|-----|-----|-----|------|----------|---------|-----------|----------|-----|-----|-----|-----|-----|
| 1 | 1         |             |            |               |      |       |       |      | 1      | 2   | 1   | 1   |      | 2        | 3       |           | 1        |     |     |     |     |     |
| 1 | 1         |             |            |               |      |       |       |      | 1      | 2   | 1   | 1   |      | 2        | 3       |           | 1        |     |     | 1   |     | 1   |
| 1 | 1         |             |            |               |      |       |       |      | 1      | 2   | 1   | 1   |      | 2        | 3       |           | 1        |     | 1   |     | 1   |     |
| 1 | 1         |             |            |               |      |       |       |      | 1      | 2   | 1   | 1   |      | 2        | 3       |           | 1        |     | 1   | 1   | 1   | 1   |
| 1 | 1         |             |            |               |      | 1     |       |      | 1      | 2   | 1   | 1   | 1    | 2        | 3       |           | 1        |     |     | 2   |     | 2   |
| 1 | 1         |             |            |               |      | 1     |       |      | 1      | 2   | 1   | 1   | 1    | 2        | 3       |           | 1        |     | 1   | 2   | 1   | 2   |
| 1 | 1         |             |            |               |      | 1     | 1     |      | 1      | 2   | 1   | 1   | 1    | 2        | 3       |           |          |     | 2   |     | 2   |     |
| 1 | 1         |             |            |               |      | 1     | 1     |      | 1      | 2   | 1   | 1   | 1    | 2        | 3       |           |          |     | 2   | 1   | 2   | 1   |
| 1 | 1         |             |            |               |      | 1     | 1     |      | 1      | 2   | 1   | 1   | 1    | 2        | 3       |           |          |     | 2   | 2   | 2   | 2   |

No DNA damage: apoptosis

With DNA damage: apoptosis

**p16INK4a & p14ARF LoF**

|  | apoptosis | cyclearrest | senescence | proliferation | SASP | CHEK1 | CHEK2 | Mdm2 | p14ARF | p53 | p21 | pRB | Wee1 | p16INK4a | p38MAPK | CdkCyclin | Cdc25ABC | E2F | ATM | ATR | DSB | SSB |
|--|-----------|-------------|------------|---------------|------|-------|-------|------|--------|-----|-----|-----|------|----------|---------|-----------|----------|-----|-----|-----|-----|-----|
|  |           |             |            | 1             |      |       |       |      |        |     |     |     |      |          |         | 1         | 2        | 1   |     |     |     |     |
|  | 1         |             |            |               |      |       |       | 1    |        | 1   | 1   | 1   |      |          | 1       |           | 1        |     | 1   |     | 1   | 1   |
|  | 1         |             |            |               |      |       |       | 1    |        | 1   | 1   | 1   |      |          | 1       |           | 1        |     | 1   |     | 1   | 1   |
|  | 1         |             |            |               |      |       |       | 1    |        | 1   | 1   | 1   | 1    |          | 1       |           | 1        |     | 1   | 1   | 1   | 1   |
|  | 1         |             |            |               |      | 1     |       | 1    |        | 1   | 1   | 1   | 1    |          | 1       |           | 1        |     | 1   | 2   | 1   | 2   |
|  | 1         |             |            |               |      | 1     |       | 1    |        | 1   | 1   | 1   | 1    |          | 1       |           | 1        |     | 1   | 2   | 1   | 2   |
|  | 1         |             |            |               |      | 1     | 1     | 1    |        | 1   | 1   | 1   | 1    |          | 2       |           |          |     | 2   |     | 2   |     |
|  | 1         |             |            |               |      | 1     | 1     | 1    |        | 1   | 1   | 1   | 1    |          | 2       |           |          |     | 2   | 1   | 2   | 1   |
|  | 1         |             |            |               |      | 1     | 1     | 1    |        | 1   | 1   | 1   | 1    |          | 3       |           |          |     | 2   | 2   | 2   | 2   |

No DNA damage: proliferation

With DNA damage: loss of senescence & apoptosis

**p16INK4a LoF**

|   | apoptosis | cyclearrest | senescence | proliferation | SASP | CHEK1 | CHEK2 | Mdm2 | p14ARF | p53 | p21 | pRB | Wee1 | p16INK4a | p38MAPK | CdkCyclin | Cdc25ABC | E2F | ATM | ATR | DSB | SSB |
|---|-----------|-------------|------------|---------------|------|-------|-------|------|--------|-----|-----|-----|------|----------|---------|-----------|----------|-----|-----|-----|-----|-----|
|   |           |             |            | 1             |      |       |       |      | 1      |     |     |     |      |          |         | 1         | 2        | 1   |     |     |     |     |
|   | 1         |             |            |               |      |       |       | 1    |        | 1   | 1   | 1   |      |          | 1       |           | 1        |     | 1   |     | 1   | 1   |
|   | 1         |             |            |               |      |       |       | 1    |        | 1   | 1   | 1   |      |          | 1       |           | 1        |     | 1   |     | 1   | 1   |
|   | 1         |             |            |               |      |       |       | 1    |        | 1   | 1   | 1   | 1    |          | 1       |           | 1        |     | 1   | 1   | 1   | 1   |
|   | 1         |             |            |               |      | 1     |       | 1    |        | 1   | 1   | 1   | 1    |          | 1       |           | 1        |     | 1   | 2   | 1   | 2   |
|   | 1         |             |            |               |      | 1     |       | 1    |        | 1   | 1   | 1   | 1    |          | 1       |           | 1        |     | 1   | 2   | 1   | 2   |
|   | 1         |             |            |               |      | 1     | 1     | 1    |        | 1   | 1   | 1   | 1    |          | 2       |           |          |     | 2   |     | 2   |     |
|   | 1         |             |            |               |      | 1     | 1     | 1    |        | 1   | 1   | 1   | 1    |          | 2       |           |          |     | 2   | 1   | 2   | 1   |
| 1 | 1         |             |            |               |      | 1     | 1     |      | 1      | 2   | 1   | 1   | 1    |          | 3       |           |          |     | 2   | 2   | 2   | 2   |

No DNA damage: proliferation

With DNA damage: loss of senescence

**p16INK4a GoF [1]**

|   | apoptosis | cyclearrest | senescence | proliferation | SASP | CHEK1 | CHEK2 | Mdm2 | p14ARF | p53 | p21 | pRB | Wee1 | p16INK4a | p38MAPK | CdkCyclin | Cdc25ABC | E2F | ATM | ATR | DSB | SSB |   |
|---|-----------|-------------|------------|---------------|------|-------|-------|------|--------|-----|-----|-----|------|----------|---------|-----------|----------|-----|-----|-----|-----|-----|---|
|   | 1         |             |            |               |      |       |       |      |        |     |     | 1   |      | 1        |         |           | 2        |     |     |     |     |     |   |
|   | 1         |             |            |               |      |       |       | 1    |        | 1   | 1   | 1   |      | 1        | 1       |           | 1        |     |     | 1   |     |     | 1 |
|   | 1         |             |            |               |      |       |       | 1    |        | 1   | 1   | 1   |      | 1        | 1       |           | 1        |     | 1   |     | 1   |     |   |
|   | 1         |             |            |               |      |       |       | 1    |        | 1   | 1   | 1   |      | 1        | 1       |           | 1        |     | 1   | 1   | 1   | 1   | 1 |
|   | 1         |             |            |               |      | 1     |       | 1    |        | 1   | 1   | 1   | 1    | 1        | 1       |           | 1        |     |     | 2   |     | 2   | 2 |
|   | 1         |             |            |               |      | 1     |       | 1    |        | 1   | 1   | 1   | 1    | 1        | 1       |           | 1        |     | 1   | 2   | 1   | 2   | 2 |
|   | 1         | 1           |            |               | 1    | 1     | 1     | 1    |        | 1   | 1   | 1   | 1    | 1        | 2       |           |          |     | 2   |     | 2   |     |   |
|   | 1         | 1           |            |               | 1    | 1     | 1     | 1    |        | 1   | 1   | 1   | 1    | 1        | 2       |           |          |     | 2   | 1   | 2   | 1   | 1 |
| 1 | 1         |             |            |               | 1    | 1     |       |      | 1      | 2   | 1   | 1   | 1    | 1        | 3       |           |          |     | 2   | 2   | 2   | 2   | 2 |

No DNA damage: cycle arrest  
 With DNA damage: similar to the wild type

**p16INK4a GoF [2]**

|   | apoptosis | cyclearrest | senescence | proliferation | SASP | CHEK1 | CHEK2 | Mdm2 | p14ARF | p53 | p21 | pRB | Wee1 | p16INK4a | p38MAPK | CdkCyclin | Cdc25ABC | E2F | ATM | ATR | DSB | SSB |   |
|---|-----------|-------------|------------|---------------|------|-------|-------|------|--------|-----|-----|-----|------|----------|---------|-----------|----------|-----|-----|-----|-----|-----|---|
|   | 1         |             |            |               |      |       |       |      |        |     |     | 1   |      | 2        |         |           | 2        |     |     |     |     |     |   |
|   | 1         | 1           |            |               |      |       |       | 1    |        | 1   | 1   | 1   |      | 2        | 1       |           | 1        |     |     | 1   |     | 1   | 1 |
|   | 1         | 1           |            |               |      |       |       | 1    |        | 1   | 1   | 1   |      | 2        | 1       |           | 1        |     | 1   |     | 1   | 1   | 1 |
|   | 1         | 1           |            |               |      | 1     |       | 1    |        | 1   | 1   | 1   | 1    | 2        | 1       |           | 1        |     |     | 2   |     | 2   | 2 |
|   | 1         | 1           |            |               |      | 1     |       | 1    |        | 1   | 1   | 1   | 1    | 2        | 1       |           | 1        |     | 1   | 2   | 1   | 2   | 2 |
|   | 1         | 1           |            |               | 1    | 1     | 1     | 1    |        | 1   | 1   | 1   | 1    | 2        | 2       |           |          |     | 2   |     | 2   |     |   |
|   | 1         | 1           |            |               | 1    | 1     | 1     | 1    |        | 1   | 1   | 1   | 1    | 2        | 2       |           |          |     | 2   | 1   | 2   | 2   | 1 |
| 1 | 1         |             |            |               | 1    | 1     |       |      | 1      | 2   | 1   | 1   | 1    | 2        | 3       |           |          |     | 2   | 2   | 2   | 2   | 2 |

No DNA damage: cycle arrest  
 With DNA damage: senescence enhanced

**p53 LoF**

|   | apoptosis | cyclearrest | senescence | proliferation | SASP | CHEK1 | CHEK2 | Mdm2 | p14ARF | p53 | p21 | pRB | Wee1 | p16INK4a | p38MAPK | CdkCyclin | Cdc25ABC | E2F | ATM | ATR | DSB | SSB |   |
|---|-----------|-------------|------------|---------------|------|-------|-------|------|--------|-----|-----|-----|------|----------|---------|-----------|----------|-----|-----|-----|-----|-----|---|
|   |           |             |            | 1             |      |       |       |      | 1      |     |     |     |      |          |         | 1         | 2        | 1   |     |     |     |     |   |
|   | 1         |             |            |               |      |       |       |      |        |     |     | 1   |      | 1        | 1       |           | 1        |     |     | 1   |     | 1   | 1 |
|   | 1         |             |            |               |      |       |       |      |        |     |     | 1   |      | 1        | 1       |           | 1        |     | 1   |     | 1   | 1   | 1 |
|   | 1         |             |            |               |      |       |       |      |        |     |     | 1   | 1    | 1        | 1       |           | 1        |     |     | 2   |     | 2   | 2 |
|   | 1         |             |            |               |      | 1     |       |      |        |     |     | 1   | 1    | 1        | 1       |           | 1        |     | 1   | 2   | 1   | 2   | 2 |
|   | 1         |             |            |               |      | 1     | 1     |      |        |     |     | 1   | 1    | 1        | 2       |           |          |     | 2   |     | 2   |     |   |
|   | 1         |             |            |               |      | 1     | 1     |      |        |     |     | 1   | 1    | 1        | 2       |           |          |     | 2   | 1   | 2   | 2   | 1 |
| 1 | 1         |             |            |               |      | 1     | 1     |      | 1      |     |     | 1   | 1    | 2        | 3       |           |          |     | 2   | 2   | 2   | 2   | 2 |

No DNA damage: proliferation  
 With DNA damage: loss of senescence & apoptosis

### p53 GoF [1]

|  | apoptosis | cyclearrest | senescence | proliferation | SASP | CHEK1 | CHEK2 | Mdm2 | p14ARF | p53 | p21 | pRB | Wee1 | p16INK4a | p38MAPK | CdkCyclin | Cdc25ABC | E2F | ATM | ATR | DSB | SSB |   |
|--|-----------|-------------|------------|---------------|------|-------|-------|------|--------|-----|-----|-----|------|----------|---------|-----------|----------|-----|-----|-----|-----|-----|---|
|  | 1         |             |            |               |      |       |       | 1    |        | 1   | 1   | 1   |      |          |         |           | 2        |     |     |     |     |     |   |
|  | 1         |             |            |               |      |       |       | 1    |        | 1   | 1   | 1   |      | 1        | 1       |           | 1        |     |     | 1   |     |     | 1 |
|  | 1         |             |            |               |      |       |       | 1    |        | 1   | 1   | 1   |      | 1        | 1       |           | 1        |     | 1   |     | 1   |     |   |
|  | 1         |             |            |               |      |       |       | 1    |        | 1   | 1   | 1   |      | 1        | 1       |           | 1        |     | 1   | 1   | 1   | 1   | 1 |
|  | 1         |             |            |               |      | 1     |       | 1    |        | 1   | 1   | 1   | 1    | 1        | 1       |           | 1        |     |     | 2   |     |     | 2 |
|  | 1         |             |            |               |      | 1     |       | 1    |        | 1   | 1   | 1   | 1    | 1        | 1       |           | 1        |     | 1   | 2   | 1   | 1   | 2 |
|  | 1         | 1           |            |               | 1    | 1     | 1     |      | 1      | 1   | 1   | 1   | 1    | 2        | 3       |           |          |     | 2   | 2   | 2   | 2   | 2 |
|  | 1         | 1           |            |               | 1    | 1     | 1     | 1    |        | 1   | 1   | 1   | 1    | 1        | 2       |           |          |     | 2   |     | 2   |     |   |
|  | 1         | 1           |            |               | 1    | 1     | 1     | 1    |        | 1   | 1   | 1   | 1    | 1        | 2       |           |          |     | 2   | 1   | 2   |     | 1 |

No DNA damage: cycle arrest

With DNA damage: senescence enhanced

### p53 GoF [2]

|   | apoptosis | cyclearrest | senescence | proliferation | SASP | CHEK1 | CHEK2 | Mdm2 | p14ARF | p53 | p21 | pRB | Wee1 | p16INK4a | p38MAPK | CdkCyclin | Cdc25ABC | E2F | ATM | ATR | DSB | SSB |   |
|---|-----------|-------------|------------|---------------|------|-------|-------|------|--------|-----|-----|-----|------|----------|---------|-----------|----------|-----|-----|-----|-----|-----|---|
| 1 | 1         |             |            |               |      |       |       | 1    |        | 2   | 1   | 1   |      |          |         |           | 2        |     |     |     |     |     |   |
| 1 | 1         |             |            |               |      |       |       | 1    |        | 2   | 1   | 1   |      | 1        | 1       |           | 1        |     |     | 1   |     |     | 1 |
| 1 | 1         |             |            |               |      |       |       | 1    |        | 2   | 1   | 1   |      | 1        | 1       |           | 1        |     | 1   |     | 1   |     |   |
| 1 | 1         |             |            |               |      |       |       | 1    |        | 2   | 1   | 1   |      | 1        | 1       |           | 1        |     | 1   | 1   | 1   | 1   | 1 |
| 1 | 1         |             |            |               |      | 1     |       | 1    |        | 2   | 1   | 1   | 1    | 1        | 1       |           | 1        |     |     | 2   |     |     | 2 |
| 1 | 1         |             |            |               |      | 1     |       | 1    |        | 2   | 1   | 1   | 1    | 1        | 1       |           | 1        |     | 1   | 2   | 1   | 1   | 2 |
| 1 | 1         |             |            |               |      | 1     | 1     |      | 1      | 2   | 1   | 1   | 1    | 2        | 3       |           |          |     | 2   | 2   | 2   | 2   | 2 |
| 1 | 1         |             |            |               |      | 1     | 1     | 1    |        | 2   | 1   | 1   | 1    | 1        | 2       |           |          |     | 2   |     | 2   |     |   |
| 1 | 1         |             |            |               |      | 1     | 1     | 1    |        | 2   | 1   | 1   | 1    | 1        | 2       |           |          |     | 2   | 1   | 2   |     | 1 |

No DNA damage: apoptosis

With DNA damage: apoptosis

### ATM LoF

No DNA damage: proliferation

With DNA damage: loss of senescence & apoptosis

### ATM GoF [1]

|  | apoptosis | cyclearrest | senescence | proliferation | SASP | CHEK1 | CHEK2 | Mdm2 | p14ARF | p53 | p21 | pRB | Wee1 | p16INK4a | p38MAPK | CdkCyclin | Cdc25ABC | E2F | ATM | ATR | DSB | SSB |   |
|--|-----------|-------------|------------|---------------|------|-------|-------|------|--------|-----|-----|-----|------|----------|---------|-----------|----------|-----|-----|-----|-----|-----|---|
|  |           |             |            | 1             |      |       |       |      | 1      |     |     |     |      |          |         | 1         | 2        | 1   |     |     |     | *   |   |
|  | 1         |             |            |               |      |       |       | 1    |        | 1   | 1   | 1   |      | 1        | 1       |           | 1        |     |     | 1   | *   | *   | 1 |
|  | 1         |             |            |               |      | 1     |       | 1    |        | 1   | 1   | 1   | 1    | 1        | 1       |           | 1        |     | 2   | *   | *   | *   | 2 |

No DNA damage: cycle arrest

With DNA damage: loss of senescence & apoptosis

### ATM GoF [2]

|  | apoptosis | cyclearrest | senescence | proliferation | SASP | CHEK1 | CHEK2 | Mdm2 | p14ARF | p53 | p21 | pRB | Wee1 | p16INK4a | p38MAPK | CdkCyclin | Cdc25ABC | E2F | ATM | ATR | DSB | SSB |   |
|--|-----------|-------------|------------|---------------|------|-------|-------|------|--------|-----|-----|-----|------|----------|---------|-----------|----------|-----|-----|-----|-----|-----|---|
|  | 1         | 1           | 1          | 1             | 1    | 1     | 1     | 1    | 1      | 1   | 1   | 1   | 1    | 1        | 2       |           |          |     | 2   |     | 1   | *   |   |
|  | 1         | 1           | 1          | 1             | 1    | 1     | 1     | 1    | 1      | 1   | 1   | 1   | 1    | 1        | 2       |           |          |     | 2   | 1   | *   | *   | 1 |
|  | 1         | 1           | 1          | 1             | 1    | 1     | 1     | 1    | 1      | 2   | 1   | 1   | 1    | 2        | 3       |           |          |     | 2   | 2   | 2   | *   | 2 |

No DNA damage: enhanced senescence

With DNA damage: enhanced senescence

### ATR & p53 LoF

|  | apoptosis | cyclearrest | senescence | proliferation | SASP | CHEK1 | CHEK2 | Mdm2 | p14ARF | p53 | p21 | pRB | Wee1 | p16INK4a | p38MAPK | CdkCyclin | Cdc25ABC | E2F | ATM | ATR | DSB | SSB |   |
|--|-----------|-------------|------------|---------------|------|-------|-------|------|--------|-----|-----|-----|------|----------|---------|-----------|----------|-----|-----|-----|-----|-----|---|
|  |           |             |            | 1             |      |       |       |      | 1      |     |     |     |      |          |         | 1         | 2        | 1   |     |     |     | *   | * |
|  | 1         |             |            |               |      |       |       |      |        |     |     | 1   |      | 1        | 1       |           | 1        |     | 1   |     | 1   | *   | * |
|  | 1         |             |            |               |      | 1     | 1     |      |        |     |     | 1   | 1    | 1        | 2       |           |          |     | 2   |     | 2   | *   | * |

No DNA damage: proliferation

With DNA damage: loss of senescence & apoptosis

### p21 LoF

|  | apoptosis | cyclearrest | senescence | proliferation | SASP | CHEK1 | CHEK2 | Mdm2 | p14ARF | p53 | p21 | pRB | Wee1 | p16INK4a | p38MAPK | CdkCyclin | Cdc25ABC | E2F | ATM | ATR | DSB | SSB |   |
|--|-----------|-------------|------------|---------------|------|-------|-------|------|--------|-----|-----|-----|------|----------|---------|-----------|----------|-----|-----|-----|-----|-----|---|
|  |           |             |            | 1             |      |       |       |      | 1      |     |     |     |      |          |         | 1         | 2        | 1   |     |     |     |     |   |
|  | 1         |             |            |               |      |       |       | 1    | 1      |     |     | 1   |      | 1        | 1       | 1         | 1        |     |     | 1   |     | 1   | 1 |
|  | 1         |             |            |               |      |       |       | 1    | 1      |     |     | 1   |      | 1        | 1       | 1         | 1        |     |     | 1   | 1   | 1   | 1 |
|  | 1         |             |            |               |      |       |       | 1    | 1      |     |     | 1   | 1    | 1        | 1       | 1         | 1        |     |     | 1   | 1   | 1   | 1 |
|  | 1         |             |            |               |      | 1     |       | 1    | 1      |     |     | 1   | 1    | 1        | 1       | 1         | 1        |     |     | 1   | 2   | 1   | 2 |
|  | 1         |             |            |               |      | 1     | 1     | 1    | 1      |     |     | 1   | 1    | 1        | 2       |           |          |     | 2   |     | 2   | 2   |   |
|  | 1         |             |            |               |      | 1     | 1     | 1    | 1      |     |     | 1   | 1    | 1        | 2       |           |          |     | 2   | 1   | 2   | 2   | 1 |
|  | 1         | 1           |            |               |      | 1     | 1     |      | 1      | 2   |     | 1   | 1    | 2        | 3       |           |          |     | 2   | 2   | 2   | 2   | 2 |

No DNA damage: proliferation

With DNA damage: loss of senescence

**p21 GoF**

|   | apoptosis | cyclearrest | senescence | proliferation | SASP | CHEK1 | CHEK2 | Mdm2 | p14ARF | p53 | p21 | pRB | Wee1 | p16INK4a | p38MAPK | CdkCyclin | Cdc25ABC | E2F | ATM | ATR | DSB | SSB |   |
|---|-----------|-------------|------------|---------------|------|-------|-------|------|--------|-----|-----|-----|------|----------|---------|-----------|----------|-----|-----|-----|-----|-----|---|
|   |           | 1           |            |               |      |       |       |      |        |     | 1   | 1   |      |          |         |           | 2        |     |     |     |     |     |   |
|   | 1         |             |            |               |      |       |       | 1    |        | 1   | 1   | 1   |      | 1        | 1       |           | 1        |     |     | 1   |     | 1   | 1 |
|   | 1         |             |            |               |      |       |       | 1    |        | 1   | 1   | 1   |      | 1        | 1       |           | 1        |     | 1   |     | 1   | 1   |   |
|   | 1         |             |            |               |      |       |       | 1    |        | 1   | 1   | 1   |      | 1        | 1       |           | 1        |     | 1   | 1   | 1   | 1   | 1 |
|   | 1         |             |            |               |      | 1     |       | 1    |        | 1   | 1   | 1   | 1    | 1        | 1       |           | 1        |     |     | 2   |     | 2   | 2 |
|   | 1         |             |            |               |      | 1     |       | 1    |        | 1   | 1   | 1   | 1    | 1        | 1       |           | 1        |     | 1   | 2   | 1   | 2   | 2 |
|   | 1         | 1           |            |               | 1    | 1     | 1     | 1    |        | 1   | 1   | 1   | 1    | 1        | 1       |           | 1        |     | 2   |     | 2   | 2   |   |
|   | 1         | 1           |            |               | 1    | 1     | 1     | 1    |        | 1   | 1   | 1   | 1    | 1        | 2       |           |          |     | 2   | 1   | 2   | 2   | 1 |
| 1 | 1         |             |            |               |      | 1     | 1     |      | 1      | 2   | 1   | 1   | 1    | 2        | 3       |           |          |     | 2   | 2   | 2   | 2   | 2 |

No DNA damage: cycle arrest  
 With DNA damage: similar to the wild type

**Cdc25ABC LoF**

|   | apoptosis | cyclearrest | senescence | proliferation | SASP | CHEK1 | CHEK2 | Mdm2 | p14ARF | p53 | p21 | pRB | Wee1 | p16INK4a | p38MAPK | CdkCyclin | Cdc25ABC | E2F | ATM | ATR | DSB | SSB |   |
|---|-----------|-------------|------------|---------------|------|-------|-------|------|--------|-----|-----|-----|------|----------|---------|-----------|----------|-----|-----|-----|-----|-----|---|
|   | 1         |             |            |               |      |       |       |      |        |     |     | 1   |      |          |         |           |          |     |     |     |     |     |   |
|   | 1         | 1           |            |               |      |       |       | 1    |        | 1   | 1   | 1   |      | 1        | 1       |           |          |     |     | 1   |     | 1   | 1 |
|   | 1         | 1           |            |               |      |       |       | 1    |        | 1   | 1   | 1   |      | 1        | 1       |           |          |     | 1   | 1   | 1   | 1   | 1 |
|   | 1         | 1           |            |               |      |       |       | 1    |        | 1   | 1   | 1   | 1    | 1        | 1       |           |          |     | 1   | 1   | 1   | 1   | 1 |
|   | 1         | 1           |            |               |      | 1     |       | 1    |        | 1   | 1   | 1   | 1    | 1        | 1       |           |          |     | 1   | 2   | 2   | 2   | 2 |
|   | 1         | 1           |            |               | 1    | 1     | 1     | 1    |        | 1   | 1   | 1   | 1    | 1        | 1       |           |          |     | 2   | 2   | 2   | 2   | 2 |
|   | 1         | 1           |            |               | 1    | 1     | 1     | 1    |        | 1   | 1   | 1   | 1    | 1        | 2       |           |          |     | 2   | 1   | 2   | 2   | 1 |
| 1 | 1         |             |            |               |      | 1     | 1     |      | 1      | 2   | 1   | 1   | 1    | 2        | 3       |           |          |     | 2   | 2   | 2   | 2   | 2 |

No DNA damage: cycle arrest  
 With DNA damage: senescence enhanced

**Cdc25ABC GoF [1-2]**

|   | apoptosis | cyclearrest | senescence | proliferation | SASP | CHEK1 | CHEK2 | Mdm2 | p14ARF | p53 | p21 | pRB | Wee1 | p16INK4a | p38MAPK | CdkCyclin | Cdc25ABC | E2F | ATM | ATR | DSB | SSB |   |
|---|-----------|-------------|------------|---------------|------|-------|-------|------|--------|-----|-----|-----|------|----------|---------|-----------|----------|-----|-----|-----|-----|-----|---|
|   |           |             |            | 1             |      |       |       |      | 1      |     |     |     |      |          |         | 1         | 2        | 1   |     |     |     |     |   |
|   | 1         |             |            |               |      |       |       | 1    |        | 1   | 1   | 1   |      | 1        | 1       |           | 1        |     |     | 1   |     | 1   | 1 |
|   | 1         |             |            |               |      |       |       | 1    |        | 1   | 1   | 1   |      | 1        | 1       |           | 1        |     | 1   |     | 1   | 1   | 1 |
|   | 1         |             |            |               |      |       |       | 1    |        | 1   | 1   | 1   | 1    | 1        | 1       |           | 1        |     | 1   | 1   | 1   | 1   | 1 |
|   | 1         |             |            |               |      | 1     |       | 1    |        | 1   | 1   | 1   | 1    | 1        | 1       |           | 1        |     | 1   | 2   | 2   | 2   | 2 |
|   | 1         |             |            |               |      | 1     | 1     | 1    |        | 1   | 1   | 1   | 1    | 1        | 1       |           | 1        |     | 2   | 2   | 2   | 2   | 2 |
|   | 1         |             |            |               |      | 1     | 1     | 1    |        | 1   | 1   | 1   | 1    | 1        | 2       |           | 1        |     | 2   | 1   | 2   | 2   | 1 |
| 1 | 1         |             |            |               |      | 1     | 1     |      | 1      | 2   | 1   | 1   | 1    | 2        | 3       |           | 1        |     | 2   | 2   | 2   | 2   | 2 |

No DNA damage: proliferation  
 With DNA damage: [1-2] loss of senescence

### E2F LoF

|  | apoptosis | cyclearrest | senescence | proliferation | SASP | CHEK1 | CHEK2 | Mdm2 | p14ARF | p53 | p21 | pRB | Wee1 | p16INK4a | p38MAPK | CdkCyclin | Cdc25ABC | E2F | ATM | ATR | DSB | SSB |   |
|--|-----------|-------------|------------|---------------|------|-------|-------|------|--------|-----|-----|-----|------|----------|---------|-----------|----------|-----|-----|-----|-----|-----|---|
|  | 1         | 1           |            |               |      |       |       |      |        |     |     |     |      |          |         | 1         | 2        |     |     |     |     |     |   |
|  | 1         | 1           |            |               |      |       |       | 1    |        | 1   | 1   | 1   |      | 1        | 1       |           | 1        |     |     | 1   |     |     | 1 |
|  | 1         | 1           |            |               |      |       |       | 1    |        | 1   | 1   | 1   |      | 1        | 1       |           | 1        |     | 1   |     | 1   |     |   |
|  | 1         | 1           |            |               |      |       |       | 1    |        | 1   | 1   | 1   |      | 1        | 1       |           | 1        |     | 1   | 1   | 1   | 1   | 1 |
|  | 1         | 1           |            |               |      | 1     |       | 1    |        | 1   | 1   | 1   | 1    | 1        | 1       |           | 1        |     |     | 2   |     | 2   | 2 |
|  | 1         | 1           |            |               |      | 1     |       | 1    |        | 1   | 1   | 1   | 1    | 1        | 1       |           | 1        |     | 1   | 2   | 1   | 2   | 2 |
|  | 1         | 1           | 1          |               | 1    | 1     | 1     | 1    |        | 1   | 1   | 1   | 1    | 1        | 2       |           |          |     | 2   |     | 2   |     |   |
|  | 1         | 1           | 1          |               | 1    | 1     | 1     | 1    |        | 1   | 1   | 1   | 1    | 2        |         |           |          |     | 2   | 1   | 2   | 2   | 1 |
|  | 1         | 1           |            |               |      | 1     | 1     |      | 1      | 2   | 1   | 1   | 1    | 2        | 3       |           |          |     | 2   | 2   | 2   | 2   | 2 |

No DNA damage: cycle arrest

With DNA damage: similar to the wild type

### E2F GoF

|   | apoptosis | cyclearrest | senescence | proliferation | SASP | CHEK1 | CHEK2 | Mdm2 | p14ARF | p53 | p21 | pRB | Wee1 | p16INK4a | p38MAPK | CdkCyclin | Cdc25ABC | E2F | ATM | ATR | DSB | SSB |   |
|---|-----------|-------------|------------|---------------|------|-------|-------|------|--------|-----|-----|-----|------|----------|---------|-----------|----------|-----|-----|-----|-----|-----|---|
|   |           |             |            | 1             |      |       |       |      | 1      |     |     |     |      |          |         | 1         | 2        | 1   |     |     |     |     |   |
| 1 | 1         |             |            |               |      |       |       |      | 1      | 2   | 1   | 1   |      | 1        | 1       |           | 1        | 1   |     | 1   |     |     | 1 |
| 1 | 1         |             |            |               |      |       |       |      | 1      | 2   | 1   | 1   |      | 1        | 1       |           | 1        | 1   | 1   |     | 1   |     |   |
| 1 | 1         |             |            |               |      |       |       |      | 1      | 2   | 1   | 1   |      | 1        | 1       |           | 1        | 1   | 1   | 1   | 1   | 1   | 1 |
| 1 | 1         |             |            |               |      | 1     |       |      | 1      | 2   | 1   | 1   | 1    | 1        | 1       |           | 1        | 1   |     | 2   |     | 2   | 2 |
| 1 | 1         |             |            |               |      | 1     | 1     |      | 1      | 2   | 1   | 1   | 1    | 1        | 2       |           | 1        | 1   | 1   | 2   | 1   | 2   | 2 |
| 1 | 1         |             |            |               |      | 1     | 1     |      | 1      | 2   | 1   | 1   | 1    | 2        |         |           | 1        | 2   |     | 2   | 2   | 2   | 1 |
| 1 | 1         |             |            |               |      | 1     | 1     |      | 1      | 2   | 1   | 1   | 1    | 2        | 3       |           |          | 1   | 2   | 2   | 2   | 2   | 2 |

No DNA damage: proliferation

With DNA damage: apoptosis

### pRB LoF

|   | apoptosis | cyclearrest | senescence | proliferation | SASP | CHEK1 | CHEK2 | Mdm2 | p14ARF | p53 | p21 | pRB | Wee1 | p16INK4a | p38MAPK | CdkCyclin | Cdc25ABC | E2F | ATM | ATR | DSB | SSB |   |
|---|-----------|-------------|------------|---------------|------|-------|-------|------|--------|-----|-----|-----|------|----------|---------|-----------|----------|-----|-----|-----|-----|-----|---|
|   |           |             |            | 1             |      |       |       |      | 1      |     |     |     |      |          |         | 1         | 2        | 1   |     |     |     |     |   |
| 1 | 1         |             |            |               |      | 1     | 1     |      | 1      | 2   | 1   |     | 1    | 2        | 3       |           |          |     | 2   | 2   | 2   | 2   | 2 |

No DNA damage: proliferation

With DNA damage: apoptosis for DSB=SSB=2 and undetermined for other cases

**pRB GoF**

|   | apoptosis | cyclearrest | senescence | proliferation | SASP | CHEK1 | CHEK2 | Mdm2 | p14ARF | p53 | p21 | pRB | Wee1 | p16INK4a | p38MAPK | CdkCyclin | Cdc25ABC | E2F | ATM | ATR | DSB | SSB |   |
|---|-----------|-------------|------------|---------------|------|-------|-------|------|--------|-----|-----|-----|------|----------|---------|-----------|----------|-----|-----|-----|-----|-----|---|
|   | 1         |             |            |               |      |       |       |      |        |     |     | 1   |      |          |         | 1         | 2        |     |     |     |     |     |   |
|   | 1         |             |            |               |      |       |       | 1    |        | 1   | 1   | 1   |      | 1        | 1       | 1         | 1        |     |     | 1   |     | 1   | 1 |
|   | 1         |             |            |               |      |       |       | 1    |        | 1   | 1   | 1   |      | 1        | 1       |           | 1        |     | 1   |     | 1   |     |   |
|   | 1         |             |            |               |      |       |       | 1    |        | 1   | 1   | 1   |      | 1        | 1       |           | 1        |     | 1   | 1   | 1   | 1   | 1 |
|   | 1         |             |            |               |      | 1     |       | 1    |        | 1   | 1   | 1   | 1    | 1        | 1       |           | 1        |     |     | 2   |     | 2   | 2 |
|   | 1         |             |            |               |      | 1     |       | 1    |        | 1   | 1   | 1   | 1    | 1        | 1       |           | 1        |     | 1   | 2   | 1   | 2   | 2 |
|   | 1         | 1           |            |               | 1    | 1     | 1     | 1    |        | 1   | 1   | 1   | 1    | 1        | 2       |           |          |     | 2   |     | 2   |     |   |
|   | 1         | 1           |            |               | 1    | 1     | 1     | 1    |        | 1   | 1   | 1   | 1    | 1        | 2       |           |          |     | 2   | 1   | 2   | 2   | 1 |
| 1 | 1         |             |            |               | 1    | 1     |       |      | 1      | 2   | 1   | 1   | 1    | 2        | 3       |           |          |     | 2   | 2   | 2   | 2   | 2 |

No DNA damage: cycle arrest

With DNA damage: similar to the wild type

**P16INK4a & p14ARF LoF + CdkCyclin GoF**

|  | apoptosis | cyclearrest | senescence | proliferation | SASP | CHEK1 | CHEK2 | Mdm2 | p14ARF | p53 | p21 | pRB | Wee1 | p16INK4a | p38MAPK | CdkCyclin | Cdc25ABC | E2F | ATM | ATR | DSB | SSB |   |
|--|-----------|-------------|------------|---------------|------|-------|-------|------|--------|-----|-----|-----|------|----------|---------|-----------|----------|-----|-----|-----|-----|-----|---|
|  |           |             |            | 1             |      |       |       |      |        |     |     |     |      |          |         | 1         | 2        | 1   |     |     |     |     |   |
|  |           |             |            | 1             |      |       |       | 1    |        | 1   | 1   |     |      |          | 1       | 1         | 1        | 1   |     | 1   |     | 1   | 1 |
|  |           |             |            | 1             |      |       |       | 1    |        | 1   | 1   |     |      |          | 1       | 1         | 1        | 1   | 1   |     | 1   | 1   | 1 |
|  |           |             |            | 1             |      | 1     |       | 1    |        | 1   | 1   |     | 1    |          | 1       | 1         | 1        | 1   |     | 2   |     | 2   | 2 |
|  |           |             |            | 1             |      | 1     |       | 1    |        | 1   | 1   |     | 1    |          | 1       | 1         | 1        | 1   | 1   | 2   | 1   | 2   | 2 |
|  |           |             |            | 1             |      | 1     | 1     | 1    |        | 1   | 1   |     | 1    |          | 2       | 1         |          | 1   | 2   |     | 2   |     |   |
|  |           |             |            | 1             |      | 1     | 1     | 1    |        | 1   | 1   |     | 1    |          | 2       | 1         |          | 1   | 2   | 1   | 2   | 2   | 1 |
|  |           |             |            | 1             |      | 1     | 1     | 1    |        | 1   | 1   |     | 1    |          | 3       | 1         |          | 1   | 2   | 2   | 2   | 2   | 2 |

No DNA damage: proliferation

With DNA damage: proliferation
